# Supplementary material
Source: publisher site journal article supplement (https://www.dovepress.com/article/535313)
Supplement: Supplementary file 1 [file 535313%20Revised%20supplementary%20materials.docx]

**Supplementary materials**

1. Supplementary Table 1. Definition and interpretation of the ABC pathway for integrated care – *Page 2*.
2. Supplementary Table 2. Baseline characteristics of the patients with atrial fibrillation based on survival state at 12-month follow-up – *Page 3-4*.
3. Supplementary Figure 1. Participation rates of patients and their family members in patient education and group discussions – *Page 5*.

**Supplementary Table 1** Definition and interpretation of the ABC pathway for integrated care.

| Criterion | Interpretation | Definitions |
| --- | --- | --- |
| A - Avoid stroke | Guideline adherent OACs treatment | Patients with CHA2DS2-VASc score ≥ 1 if men or ≥ 2 if women receiving OACs and patients with CHA2DS2-VASc score = 0 if men or ≤ 1 if women not receiving OACs.  The use of appropriate non-vitamin K antagonist OACs or, alternatively, warfarin with a TTR of ≥65%. |
| B - Better symptoms control | Actual AF symptoms control | EHRA score of I or II |
| C - Cardiovascular risk and comorbidity optimization | Guideline adherent disease‑specific treatment of comorbidities | (i) rest blood pressure <140/90 mmHg for hypertension,  (ii) fasting blood glucose <7.0 mmol/L for diabetes mellitus,  (iii) BMI <30.0 kg/m2 for obesity,  (iv) statins for arterial disease,  (v) statins for previous stroke/TIA, and  (vi) ACEI/ARB/ARNI for congestive heart failure, or  (vii) no management in case of no comorbidities. |

ABC, atrial fibrillation better care; OACs, oral anticoagulants; TTR, time in therapeutic range; AF, atrial fibrillation; EHRA, European Heart Rhythm Association; BMI, body mass index; TIA, transient ischemic attacks, ACEI, angiotensin-converting enzyme inhibitors; ARB, angiotensin receptor blockers; ARNI, angiotensin receptor neprilysin inhibitors.

**Supplementary Table** **2** Baseline characteristics of the patients with atrial fibrillation based on survival state at 12-month.

| Items | Total | Death | Survival | *P* value |
| --- | --- | --- | --- | --- |
| No. | 810 | 41 | 769 |  |
| Women | 416 (51.4) | 27 (65.9) | 389 (50.6) | 0.057 |
| Age, years (mean, SD) | 76.1±5.9 | 78.0±5.6 | 76.1±5.9 | 0.045 |
| ≥75 years old | 477 (58.9) | 28 (68.3) | 449 (58.4) | 0.209 |
| Systolic blood pressure, mmHg (mean, SD) | 138.8±21.6 | 140.5±22.7 | 138.7±21.6 | 0.687 |
| Diastolic blood pressure, mmHg (mean, SD) | 84.1±14.0 | 84.5±11.7 | 84.0±14.1 | 0.887 |
| Heart rate, beats/min (mean, SD) | 82.3±15.1 | 77.6±13.4 | 82.4±15.2 | 0.350 |
| Fasting blood glucose, mmol/L (mean, SD) | 6.2±1.7 | 6.9±2.3 | 6.2±1.6 | 0.060 |
| Body mass index, kg/m2 (mean, SD) | 24.5±3.6 | 23.7±2.5 | 24.5±3.6 | 0.313 |
| Known AF history | 402 (49.6) | 6 (14.6) | 396 (51.5) | <0.001 |
| ABC pathway compliance | 14 (1.7) | 0(0) | 14 (1.8) | 1.000 |
| Marital status |  |  |  | 0.125 |
| Married/Remarried/Cohabitation | 525 (64.8) | 22 (53.7) | 503 (65.4) |  |
| Unmarried/Divorced/Widowed/Separated | 285 (35.2) | 19 (46.3) | 266 (34.6)) |  |
| Living with adult children | 66 (8.1) | 2 (4.9) | 64 (8.3) | 0.767 |
| Medical insurance |  |  |  | 1.000 |
| Rural cooperative medical insurance | 795 (98.1) | 41 (100.0) | 754 (98.0) |  |
| Employee basic medical insurance | 15 (1.9) | 0 (0) | 15 (2.0) |  |
| Income |  |  |  | 0.337 |
| No income | 381 (47.0) | 16 (39.0) | 365 (47.5) |  |
| Retirement pension/house renting/ government subsidy | 429 (53.0) | 25 (61.0) | 404 (52.5) |  |
| Use of smart phone |  |  |  | 0.205 |
| No mobile phone | 361 (44.6) | 22 (53.7) | 339 (44.1) |  |
| Smartphone | 42 (5.2) | 0 (0) | 42 (5.5) |  |
| Non-smartphone | 407 (50.2) | 19 (46.3) | 388 (50.5) |  |
| Smartphone applications use | 21 (2.6) | 0 (0) | 21 (2.7) | 0.619 |
| Education level |  |  |  | 0.458 |
| Below primary school | 417 (51.5) | 25 (61.0) | 392 (51.0) |  |
| Primary school | 321 (39.6) | 13 (31.7) | 308 (40.1) |  |
| Middle and High school | 62 (7.7) | 3 (7.3) | 69 (7.9) |  |
| Comorbidities |  |  |  |  |
| Hypertension | 575 (71.0) | 24 (58.5) | 551 (71.7) | 0.071 |
| Diabetes mellitus | 195 (24.1) | 10 (24.4) | 185 (24.1) | 0.961 |
| Stroke or TIA | 34 (4.2) | 2 (4.9) | 32 (4.2) | 0.688 |

Continued…

| Items | Total | Death | Survival | *P* value |
| --- | --- | --- | --- | --- |
| CAD or PAD | 100 (12.3) | 6 (14.6) | 94 (12.2) | 0.648 |
| Congestive heart failure | 14 (1.7) | 0 (0) | 14 (1.8) | 1.000 |
| CHA2DS2-VASc score (mean, SD) | 3.3±1.1 | 3.4±1.2 | 3.3±1.1 | 0.415 |
| ≥3 in women or ≥2 in men | 744 (91.9) | 36 (87.8) | 708 (92.1) | 0.331 |

Data are number (%), unless otherwise mentioned.

ABC, atrial fibrillation better care; TIA, transient ischemic attacks; CAD, coronary artery disease; PAD, peripheral artery disease.


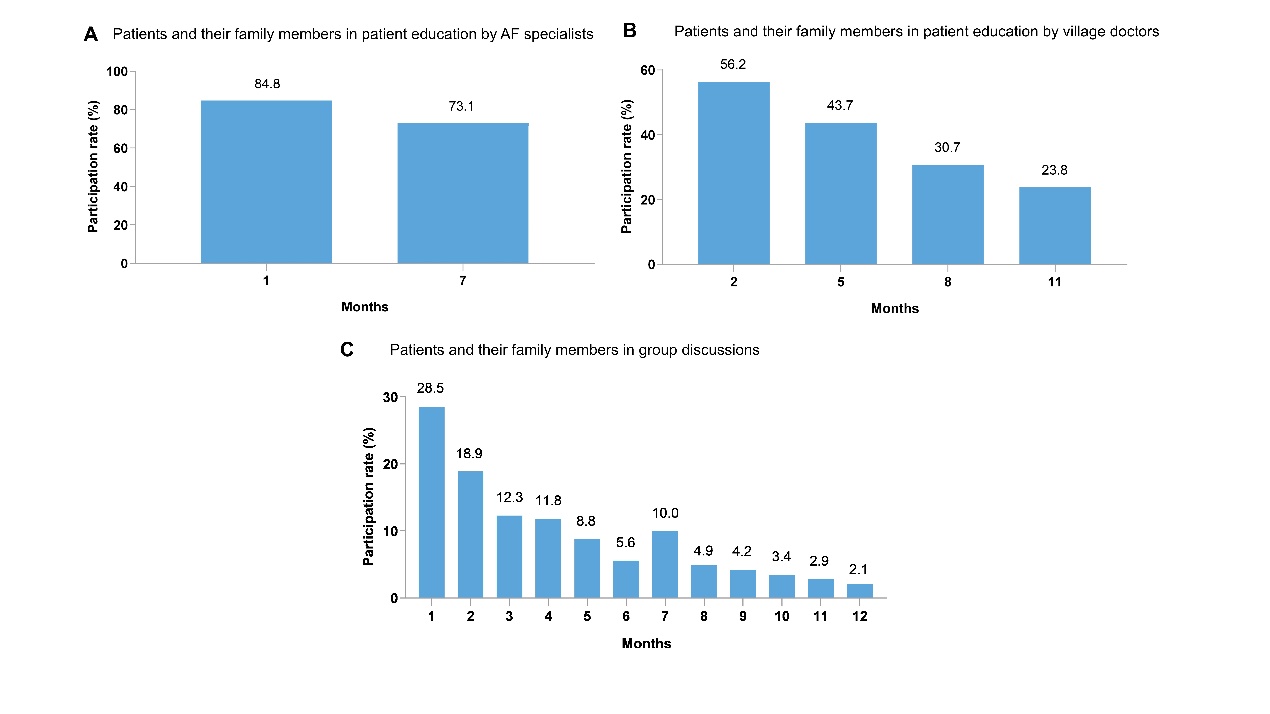


**Supplementary Figure 1** Participation rates of patients and their family members in patient education and group discussions. **(A)** Patients and their family members in patient education by AF specialists; **(B)** Patients and their family members in patient education by village doctors; **(C)** Patients and their family members in group discussions. AF, atrial fibrillation.
